# Supplementary material for: The PLAGL2/MYCN/miR-506-3p interplay regulates neuroblastoma cell fate and associates with neuroblastoma progression
Source: Springer Nature journal article supplement (doi:10.1186/s13046-020-1531-2), 2020-02-22
Supplement: MOESM1 [file 17734494]

**Table S1**

| <b>Primer name</b>        | <b>Primer sequence</b>      |
|---------------------------|-----------------------------|
| GAPDH-qPCR-F              | GGAGGTGAAGGTCGGAGTC         |
| GAPDH-qPCR-R              | GAAGATGGTGATGGGATTTTC       |
| MYCN-qPCR-F               | CACAAGGCCCTCAGTACCTC        |
| MYCN-qPCR-R               | ACCACGTCGATTTCTTCCTC        |
| PLAGL2-qPCR-F             | CAGAGACCATATAGCTGCCC        |
| PLAGL2-qPCR-R             | CCTTGCGGTGAAACATCTTATC      |
| CREB3L2-qPCR-F            | ATGTACCACACGCACTTCTC        |
| CREB3L2-qPCR-R            | CCTCCATTGACACACTCTTCTC      |
| CHIP-PCR MYCN primer 1F   | AACACGCAGTCAAAGCGGGGG       |
| CHIP-PCR MYCN primer 1R   | CCCACCCTGCGAGCCTGGCAAT      |
| CHIP-PCR MYCN primer 2F   | ATCCTCAAACGATGCCTTCC        |
| CHIP-PCR MYCN primer 2R   | CGCCTCGCTCTTTATCTTCTT       |
| CHIP-PCR PLAGL2 primer 1F | GACATCAAGTCCTGCCCCACTAACTCC |
| CHIP-PCR PLAGL2 primer 1R | TTGCAAGGGCACAGAGGGGCC       |
| CHIP-PCR PLAGL2 primer 2F | CTCTGAGGTTCTCTCCTGGACCTGTG  |
| CHIP-PCR PLAGL2 primer 2R | CCCTGCATGGGTAAGGCCTCCC      |
| CHIP-PCR PLAGL2 primer 3F | GTCCCAGGAGCCCGCAGGCATCC     |
| CHIP-PCR PLAGL2 primer 3R | GCGCTCGCGTCCCTCCTTCC        |
| CHIP-PCR PLAGL2 primer 4F | ACCATAGCTAGCCAGTCATTTTC     |
| CHIP-PCR PLAGL2 primer 4R | GGGTACTGAGTGCAGGATAAAG      |

**List of primers used in pPCR and CHIP-PCR.** Shown are the primer name and the nucleotide sequence of each primer.
