# Supplementary material for: The PLAGL2/MYCN/miR-506-3p interplay regulates neuroblastoma cell fate and associates with neuroblastoma progression
Source: Springer Nature journal article supplement (doi:10.1186/s13046-020-1531-2), 2020-02-22
Supplement: MOESM2 [file 17734494]

**Table S2**

| <b>Cell line</b> | <b>Age</b> | <b>Gender</b> | <b>Stage</b> | <b>Chr 1p alteration</b> | <b>Chr 17 alteration</b> | <b>MYCN ampl.</b> |
|------------------|------------|---------------|--------------|--------------------------|--------------------------|-------------------|
| BE(2)-C          | 2          | male          | 4            | Y                        | Y                        | Y                 |
| SKNDZ            | 2          | female        | 4            | Y                        | Y                        | N                 |
| KELLY            | unk        | unk           | unk          | unk                      | unk                      | Y                 |
| CHLA-90          | 8.5        | male          | 4            | unk                      | unk                      | N                 |
| SKNFI            | 11         | male          | unk          | unk                      | unk                      | N                 |
| NGP              | 2.6        | male          | unk          | Y                        | N                        | Y                 |
| IMR32            | 1.1        | male          | unk          | Y                        | N                        | Y                 |
| N322             | unk        | unk           | unk          | unk                      | unk                      | Y                 |
| SKNBE(2)         | 2          | male          | 4            | Y                        | Y                        | Y                 |
| CHP212           | 1.8        | unk           | unk          | unk                      | unk                      | Y                 |
| SKNMC            | 1          | female        | 4            | Y                        | Y                        | N                 |
| SKNAS            | 8          | female        | 4            | Y                        | N                        | N                 |
| MCIXC            | 1          | female        | 4            | unk                      | unk                      | N                 |
| SKNSH            | 4          | male          | 4            | Y                        | N                        | N                 |

**Genetic backgrounds of neuroblastoma cell lines used in this study.** Shown are the name of the cell line, age and gender of the patient, stage of the tumor from which the cell line was derived, chromosome 1p and 17 alterations, and MYCN gene amplification status. unk, unknown; Chr, Chromosome; ampl, amplification; Y, yes; N, no.
