# Supplementary material for: The PLAGL2/MYCN/miR-506-3p interplay regulates neuroblastoma cell fate and associates with neuroblastoma progression
Source: Springer Nature journal article supplement (doi:10.1186/s13046-020-1531-2), 2020-02-22
Supplement: MOESM3 [file 17734494]

**Table S3**

|                | RNA Sequence                           | Seed Position | Context | P <sub>CT</sub> |
|----------------|----------------------------------------|---------------|---------|-----------------|
| PLAGL2 3' UTR  | 5' UGUAUAAGAAACUU <u>UGCCUUA</u> G 3'  | 3355-3361     |         |                 |
| miR-506-3p     | 3' AGAUGAGUCUCCC- <u>ACGGAAU</u> G 5'  |               | -0.13   | 0.83            |
| CREB3L2 3' UTR | 5' ACAUGCUCUUUUG- <u>UGCCUUA</u> AA 3' | 4175-4182     |         |                 |
| miR-506-3p     | 3' AGAUGAGUCUCCC <u>ACGGAAU</u> G 5'   |               | -0.08   | <0.1            |

**The predicted target sites of miR-506-3p in the 3' UTRs of PLAGL2 and CREB3L2 mRNAs.** Shown are the predicted interactions between the target sites in the 3'UTR and miR-506-3p with the seed sequences underlined, the seed sequence position, as well as the Context and P<sub>CT</sub> scores calculated by TargetScan.
