# Supplementary material for: The PLAGL2/MYCN/miR-506-3p interplay regulates neuroblastoma cell fate and associates with neuroblastoma progression
Source: Springer Nature journal article supplement (doi:10.1186/s13046-020-1531-2), 2020-02-22
Supplement: MOESM4 [file 17734494]

**Table S4**

| <b>Gene name</b> | <b>Ratio of mRNA level (miR-506-3p/control)</b> |       |
|------------------|-------------------------------------------------|-------|
|                  | 24 h                                            | 72 h  |
| PLAGL2           | 0.470                                           | 0.785 |
| CREB3L2          | 0.514                                           | 0.455 |

**Changes in mRNA expression of PLAGL2 and CREB3L2 induced by miR-506-3p mimic detected in the gene expression microarray analysis.** Shown are the gene name and the fold change of mRNA expression levels in terms of miR-506-3p vs. control treatment following 24 h and 72 h of transfection with miR-506-3p mimic in BE(2)-C cells.
